# Supplementary material
Source: Springer Nature journal article supplement (https://www.springermedizin.de/resource/supplementary/13584_2013_72_MOESM1_ESM.pdf/9676912)

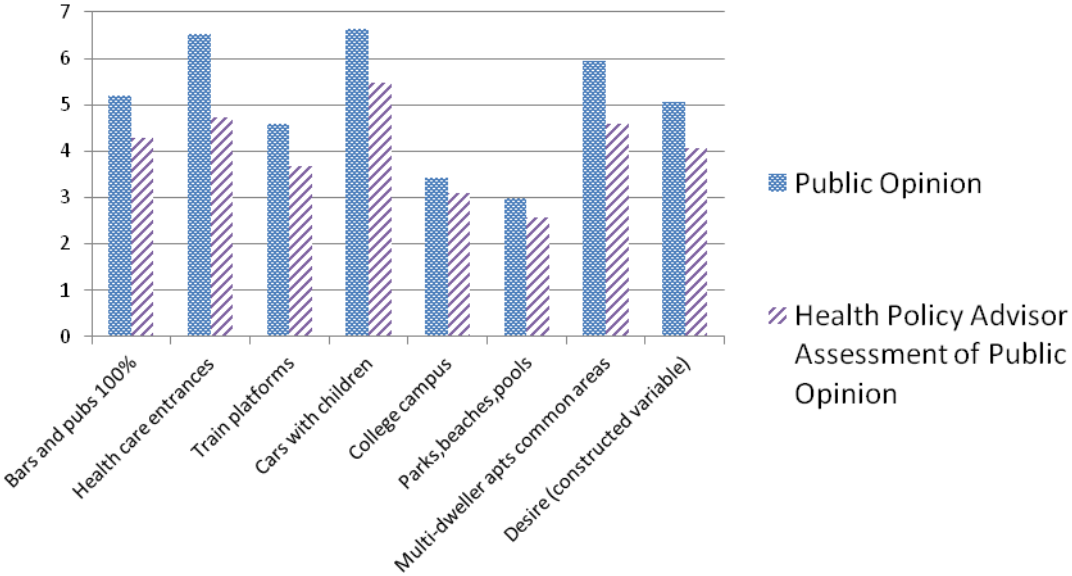

Supplement: MOESM1 [file 9676912]
